# Supplementary material for: Y-shaped two-photon absorbing molecules with an imidazole–thiazole core
Source: Royal Society of Chemistry journal article supplement (doi:10.1039/b402019g), 2004-01-01
Supplement: b402019g.doc [file b402019g.doc]

# Y-Shaped two-photon absorbing molecules with an imidazole-thiazole core

# Ke Feng, Leonardo De Boni, Lino Misoguti, C. R. Mendonça,   Michael Meador, Fu-Lian Hsu, Xiu R. Bu*

# Synthetic Experimental

All moisture-sensitive reactions were carried out under nitrogen atmosphere using flame-dried glassware. Solvents were dried over standard drying agents and freshly distilled prior to use. Other chemicals were used as received. Reactions were monitored by TLC on silica gel 60 F254. Column chromatography purifications were performed on silica gel (63 – m). 1H NMR (400 MHz) and 13C NMR (100 MHz) spectra were recorded on a Bruker ARX-400 spectrometer using TMS as reference, and reported as ppm for chemical shifts. Elemental analysis was performed in Atlantic Microlab, Norcross of Georgia. MS spectra were obtained in an EI mode. UV-vis absorption spectra were recorded on a Beckman DU 650 spectrophotometer.

**Reaction Scheme**:

**2-(2-thiazolyl)-4,5-bis(phenyl)imidazole (7)**.

A mixture of benzil (4.185 g, 19.91 mmol) and ammonium acetate (15.35 g, 199 mmol) in glacial acetic acid (140 mL) was heated to 80 oC under nitrogen atmosphere. During stirring, 2-formylthiazole(2.930 g, 25.90 mmol) in 5 mL glacial acetic acid was added dropwise over 24 h. The resulting solution was cooled to room temperature and poured into 1200 ml of ice water. The viscous precipitate was obtained via filtration, then washed several times with water. Purification by chromatography on a silica gel (eluent: hexane/ethyl acetate/CH2Cl2 2:1:1 in volume) to give **7** (3.32 g, 55% yield) as a white solid. MP 218-220 oC. 1H NMR (CDCl3):  12.05 (s, 1H), 7.65 (d, 2H, J=7.2 Hz), 7.47 (d, 1H, J=3.2 Hz), 7.39-7.24 (m, 8H), 7.19 (d, 1H, J=3.2 Hz). 13C NMR (CDCl3): 160.1, 143.7, 143.1, 141.3, 134.6, 130.6, 130.0, 129.2, 128.9, 128.8, 128.6, 128.3, 127.7, 127.5, 119.9, 119.7. MS: *m/z* 303 (M+). Anal. Calcd for C18H13N3S: C, 71.26; H, 4.32; N, 13.85; S, 10.57. Found: C, 71.02; H, 4.30; N, 13.86.

**2-(2-thiazolyl)-4,5-bis(4-methylphenyl)imidazole (8)**.

Similar procedure as for **7** led to **8** as a white solid (66% yield). MP 213-215 oC. 1H NMR (CDCl3):  11.06 (s, 1H), 7.61 (d, 1H, J=3.6 Hz), 7.55 (d, 2H, J=8.0 Hz), 7.31 (d, 2H, J=8.0 Hz), 7.27 (d, 1H, J=3.6 Hz), 7.13 (dd, 4H, J=8.0 Hz), 2.35 (s, 3H), 2.31 (s, 3H). 13C NMR (CDCl3): 160.1, 143.2, 142.9, 141.0, 139.4, 138.3, 137.1, 131.9, 129.7, 129.6, 129.5, 129.3, 129.2, 128.5, 128.3, 128.2, 128.0, 127.8, 21.8, 21.1. MS: *m/z* 331 (M+). Anal. Calcd for C20H17N3S: C, 72.48; H, 5.17; N, 12.68; S, 9.67. Found: C, 72.55; H, 5.15; N, 12.76.

**2-(2-thiazolyl)-4,5-bis(4-methoxyphenyl)imidazole (9)**.

Similar procedure as for **7** produced **9** as a white solid (71% yield). MP 199-200 oC. 1H NMR (CDCl3):  10.74 (s, 1H), 7.66 (d, 1H, J=3.2 Hz), 7.58 (d, 2H, J=8.8 Hz), 7.36 (d, 2H, J=8.8 Hz), 7.30 (d, 1H, J=3.2 Hz), 6.88 (dd, 4H, J=8.8, J=8.4 Hz), 3.88 (s, 3H), 3.83 (s, 3H). 13C NMR (CDCl3): 160.3, 159.7, 159.2, 143.1, 142.8, 140.8, 138.9, 130.1, 129.9, 129.4, 129.2, 127.4, 123.1, 119.6, 119.3, 114.6, 114.3, 114.0, 56.3, 55.3. M.S: *m/z* 363 (M+). Anal. Calcd for C20H17N3O2S: C, 66.10; H, 4.71; N, 11.56; O, 8.80; S, 8.82. Found: C, 71.37; H, 4.81; N, 13.67.

**1-methyl-2-(2-thiazolyl)-4,5-bis(phenyl)imidazole (10)**.

To a mixture of **7** (2.500 g, 7.54 mmol) in anhydrous *N*,*N*-dimethylacetamide (80 mL) and potassium carbonate (2.08 g, 15.05 mmol) was added iodomethane (1.285 g, 9.05 mmol). The reaction mixture was stirred for 12 h at 45-50 oC under nitrogen atmosphere, and then poured into a water-ice bath. The precipitate was filtered and dried. The recrystallization in 300 mL methanol gave **10** as a greenish crystal (2.50 g, 96% yield). MP 190-191 oC. 1H NMR (CDCl3):  7.82 (d, 1H, J=3.2 Hz), 7.53 (d, 2H, J=7.6 Hz), 7.46-7.35 (m, 5H), 7.30 (d, 1H, J=3.2 Hz), 7.20-7.11 (m, 3H), 3.90 (s, 3H). 13C NMR (CDCl3): 160.9, 143.5, 140.9, 139.1, 134.6, 132.5, 131.3, 130.9, 129.4, 129.3, 128.4, 127.4, 127.0, 119.7, 33.7. MS: *m/z* 317 (M+). Anal. Calcd for C19H15N3S: C, 71.90; H, 4.76; N, 13.24; S, 10.10. Found: C, 72.00; H, 4.75; N, 13.23.

**1-methyl-2-(2-thiazolyl)-4,5-bis(4-methylphenyl)imidazole (11)**.

Similar procedure as for **10** led to **11** as a greenish crystal (90% yield). MP 159-160 oC. 1H NMR (CDCl3):  7.86 (d, 1H, J=3.6 Hz), 7.43 (d, 2H, J=7.6 Hz), 7.35 (d, 1H, J=3.2 Hz), 7.28-7.22 (m, 4H), 7.04 (d, 2H, J=7.2 Hz), 3.92 (s, 3H), 2.44 (s, 3H), 2.29 (s, 3H). 13C NMR (CDCl3): 161.0, 143.5, 140.6, 139.2, 139.0, 136.6, 132.3, 131.7, 131.1, 130.2, 129.2, 127.8, 127.2, 119.7, 33.7, 21.8, 21.6. MS: *m/z* 345 (M+). Anal. Calcd for C21H19N3S: C, 73.01; H, 5.54; N, 12.16; S, 9.28. Found: C, 72.84; H, 5.57; N, 12.21.

**1-methyl-2-(2-thiazolyl)-4,5-bis(4-methoxyphenyl)imidazole (12)**.

Similar procedure as for **10** led to **12** as a greenish crystal (92% yield). MP 121-122 oC. 1H NMR (CDCl3):  7.85 (d, 1H, J=3.6 Hz), 7.47 (d, 2H, J=8.8 Hz), 7.34 (d, 1H, J=3.2 Hz), 7.29 (d, 2H, J=8.8 Hz), 7.01 (d, 2H, J=8.8 Hz), 7.78 (d, 2H, J=8.8 Hz), 3.91 (s, 3H), 3.87 (s, 3H), 3.77 (s, 3H). 13C NMR (CDCl3): 160.3, 158.8, 143.5, 140.6, 140.4, 138.8, 132.6, 131.5, 128.5, 127.4, 122.8, 119.6, 114.9, 114.0, 55.7, 55.5, 33.7. MS: *m/z* 377 (M+). Anal. Calcd for C21H19N3O2S: C, 66.82; H, 5.07; N, 11.13; O, 8.48; S, 8.50. Found: C, 67.02; H, 5.10; N, 11.19.

**1-methyl-2-[2-(5-formylthiazolyl)]-4,5-bis(phenyl)imidazole (13)**

To a solution of **10** (0.368 g, 1.16 mmol) in anhydrous THF (22 mL) was added dropwise *n*-butyllithium (2.5 M in hexane, 1.39 mL, 3.48 mmol) at -63 oC under nitrogen atmosphere. The reaction mixture was warmed to 0 oC and stirred at this temperature for 30 m. After it was cooled to -63 oC, anhydrous *N*,*N*-dimethylformamide (0.325 mL, 4.18 mmol) was added. The mixture was stirred at 0 oC for 2 h, then poured into 100 mL H2O and neutralized with 2N HCl to near pH 6. The product was extracted with acetyl acetate, dried with sodium sulfate, and concentrated. Recrystallization in mixture of acetyl acetate and hexane (1/5 in vol.) gave yellowish product (0.33 g, 83% yield). MP 193-195 oC. 1H NMR (CDCl3):  10.07 (s, 1H), 8.39 (s, 1H), 7.52-7.50 (m, 5H), 7.39-7.37 (m, 2H), 7.23-7.17 (m, 3H), 3.96 (s, 3H). 13C NMR (CDCl3): 182.4, 167.4, 152.1, 140.4, 139.7, 138.9, 134.3, 133.8, 131.1, 130.1, 129.6, 128.6, 127.5, 127.3. MS: *m/z* 345 (M+). Anal. Calcd for C20H15N3OS: C, 69.54; H, 4.38; N, 12.17; O, 4.63; S, 9.28. Found: C, 69.37; H, 4.32; N, 12.15.

**1-methyl-2-[2-(5-formylthiazolyl)]-4,5-bis(4-methylphenyl)imidazole (14)**

Similar procedure as for **13** led to **14** as a yellowish product (77%yield). MP 201-203 oC. 1H NMR (CDCl3):  10.00 (s, 1H), 8.33 (s, 1H), 7.40 (d, 2H, J=8.0 Hz), 7.29 (d, 2H, J=8.0 Hz), 7.24 (d, 2H, J=8.0 Hz), 7.03 (d, 2H, J=8.0 Hz), 3.91 (s, 3H), 2.43 (s, 3H), 2.29 (s, 3H). 13C NMR (CDCl3):182.4, 167.4, 152.3, 140.4, 139.6, 139.4, 138.7, 137.1, 134.1, 131.2, 130.9, 130.3, 129.3, 127.2, 127.1, 34.0, 21.8, 21.5. MS: *m/z* 373 (M+). Anal. Calcd for C22H19N3OS: C, 70.75; H, 5.13; N, 11.25; O, 4.28; S, 8.59. Found: C, 70.67; H, 5.11; N, 11.14.

**1-methyl-2-[2-(5-formylthiazolyl)]-4,5-bis(4-methoxyphenyl)imidazole (15)**

Similar procedure as for **13** led to **15** as a yellowish product (72%yield). MP 186-188 oC. 1H NMR (CDCl3):  10.04 (s, 1H), 8.37 (s, 1H), 7.47 (d, 2H, J=8.8 Hz), 7.29 (d, 2H, J=8.4 Hz), 7.03 (d, 2H, J=8.4 Hz), 6.79 (d, 2H, J=8.8 Hz), 3.93 (s, 3H), 3.90 (s, 3H), 3.78 (s, 3H). 13C NMR (CDCl3):182.5, 167.4, 160.6, 159.1, 152.3, 140.2, 139.3, 138.8, 138.6, 133.5, 132.4, 128.5, 126.7, 122.1, 115.1, 114.0, 55.7, 55.6, 34.0. MS: *m/z* 405 (M+). Anal. Calcd for C22H19N3O3S: C, 65.17; H, 4.72; N, 10.36; O, 11.84; S, 7.91. Found: C, 65.32; H, 4.79; N, 11.25.

**1-methyl-2-{2-[5-(4-nitrophenylvinyl)]thiazolyl}-4,5-bis(phenyl)imidazole (1)**

To a mixture of **13**(0.618 g, 1.80 mmol), triphenyl(4-nitrobenzyl)phosphonium bromide(0.948 g, 1.98 mmol) and 18-crown-6(0.120 g, 0.45 mmol) in anhydrous dichloromethane (50 mL) was added potassium *tert*-butoxide by three times (totally 0.846 g, 7.56 mmol) in 5 h under nitrogen atmosphere. The reaction mixture was continued to stir for 10 more hours at room temperature. Then the mixture was poured into 500 mL H2O, extracted with dichloromethane, dried with sodium sulfate, and concentrated. Purification was performed by column chromatography (eluent: n-hexane/EtOAc /CH2Cl2 6:1:12 in volume). Further purification by recrystallization in hexane/ CH2Cl2 gave yellowish solid (0.51 g, 61% yield). MP 247-249 oC. 1H NMR (CDCl3): 8.22 (d, 2H, J=8.4 Hz), 7.83 (s, 1H), 7.59 (d, 2H, J=8.4 Hz), 7.60-7.49 (m, 5H), 7.41-7.37 (m, 3H), 7.24-7.17 (m, 3H), 6.98 (d, 1H, J=16.0 Hz), 3.93 (s, 3H). MS: *m/z* 464 (M+). Anal. Calcd for C27H20N4O2S: C, 69.81; H, 4.34; N, 12.06; O, 6.89; S, 6.90. Found: C, 69.72; H, 4.36; N, 11.98.

1-methyl-2-{2-[5-(4-nitrophenylvinyl)]thiazolyl}-4,5-bis(4-methylphenyl)-imidazole (2)

Similar procedure as for **1** led to **2** as a yellowish solid (43%yield). MP 231-233 oC. 1H NMR (CDCl3):  8.21 (d, 2H, J=8.8 Hz), 7.82 (s, 1H), 7.59 (d, 2H, J=8.8 Hz), 7.42 (d, 2H, J=8.0 Hz), 7.38 (d, 1H, J=16.0 Hz), 7.29 (d, 2H, J=7.6 Hz), 7.25 (d, 2H, J=7.6 Hz), 7.05 (d, 2H, J=8.8 Hz), 6.96 (d, 1H, J=16.0 Hz), 3.90 (s, 3H), 2.44 (s, 3H), 2.30 (s, 3H). MS: *m/z* 492 (M+). Anal. Calcd for C29H24N4O2S: C, 70.71; H, 4.91; N, 11.37; O, 6.50; S, 6.51. Found: C, 70.82; H, 4.94; N, 11.32.

1-methyl-2-{2-[5-(4-nitrophenylvinyl)]thiazolyl}-4,5-bis(4-methoxyphenyl)-imidazole (3)

Similar procedure as for **1** led to **3** as a yellowish solid (59%yield). MP 206-208 oC. 1H NMR (CDCl3):  8.25 (d, 2H, J=8.8 Hz), 7.83 (s, 1H), 7.62 (d, 2H, J=8.8 Hz), 7.49 (d, 2H, J=9.2 Hz), 7.41 (d, 1H, J=16.0 Hz), 7.29 (d, 2H, J=8.8 Hz), 7.02 (d, 2H, J=8.8 Hz), 6.98 (d, 1H, J=16.0 Hz), 6.79 (d, 2H, J=8.8 Hz), 3.91 (s, 3H), 3.89 (s, 3H), 3.78 (s, 3H). MS: *m/z* 524 (M+). Anal. Calcd for C29H24N4O4S: C, 66.40; H, 4.61; N, 10.68; O, 12.20; S, 6.11. Found: C, 66.16; H, 4.64; N, 10.59.

1-methyl-2-{2-[5-(4-methylsulfonylphenylvinyl)]thiazolyl}-4,5-bis(phenyl)-imidazole (4)

To a mixture of **13** (0.130 g, 0.376 mmol), triphenyl(4-methylsulfonylbenzyl)-phosphonium bromide(0.226 g, 0.442 mmol) and 18-crown-6(0.026 g, 0.10 mmol) in anhydrous dichloromethane (25 mL) was added potassium *tert*-butoxide by three times (totally 0.178 g, 1.585 mmol) in 3 h under nitrogen atmosphere. The reaction mixture was continued to stir for 5 more hours at room temperature. Then the mixture was poured into 300 mL H2O, extracted with dichloromethane, dried with sodium sulfate, and concentrated. Purification was performed by column chromatography (eluent: hexane/EtOAc 2:1 in volume). Further purification by recrystallization in hexane/ EtOAc gave yellowish solid(0.13 g, 71% yield). MP 223-225 oC. 1H NMR (CDCl3):  7.92 (d, 2H, J=8.4 Hz), 7.81 (s, 1H), 7.63 (d, 2H, J=8.0 Hz), 7.53-7.45 (m, 5H), 7.39-7.35 (m, 3H), 7.26-7.16 (m, 3H), 6.95 (d, 1H, J=16.0 Hz), 3.92 (s, 3H), 3.06 (s, 3H). 13C NMR (CDCl3):159.9, 144.0, 143.0, 142.3, 140.3, 139.5, 137.5, 134.2, 133.2, 131.3, 131.1, 130.4, 129.8, 129.7, 129.6, 129.4, 128.7, 128.5, 128.3, 127.4, 126.4, 122.7, 122.5, 44.9, 34.3, 33.5. MS: *m/z* 497 (M+). Anal. Calcd for C28H23N3O2S2: C, 67.58; H, 4.66; N, 8.44; O, 6.43; S, 12.89. Found: C, 67.47; H, 4.74; N, 8.29;

1-methyl-2-{2-[5-(4-methylsulfonylphenylvinyl)]thiazolyl}-4,5-bis(4-methyl-phenyl) imidazole (5)

Similar procedure as for **4** led to **5** as a yellowish solid ( 26%yield). MP 248-249 oC. 1H NMR (CDCl3): cis-  7.97 (d, 2H, J=8.4 Hz), 7.70 (s, 1H), 7.57 (d, 2H, J=8.4 Hz), 7.43-7.20 (m, 7H), 6.99 (d, 2H, J=7.6 Hz), 6.80 (dd, 1H, J=12.4 Hz, J=12.0 Hz), 3.85 (s, 3H), 3.14 (s, 3H), 2.42 (s, 3H), 2.27(s, 3H). trans-  7.92 (d, 2H, J=8.4 Hz), 7.81 (s, 1H), 7.64 (d, 2H, J=8.4 Hz), 7.43-7.20 (m, 7H), 7.05 (d, 2H, J=8.0 Hz), 6.96 (d, 1H, J=16.0 Hz), 3.91 (s, 3H), 3.07 (s, 3H), 2.44 (s, 3H), 2.30 (s, 3H). 13C NMR (CDCl3):160.4, 160.1, 145.7, 143.9, 142.9, 142.4, 140.1, 140.0, 139.5, 139.4,137.6, 136.8, 133.6, 133.0, 132.8, 131.5, 131.1, 130.9, 130.3, 130.1, 129.6, 129.3, 129.2, 128.3, 127.3, 127.1, 126.4, 122.7, 122.6, 45.0, 34.3, 33.4, 22.5, 22.2, 21.6, 21.0. MS: *m/z* 525 (M+). Anal. Calcd for C30H27N3O2S2: C, 68.54; H, 5.18; N, 7.99; O, 6.09; S, 12.20. Found: C, 68.39; H, 5.28; N, 7.76;

1-methyl-2-{2-[5-(4-methylsulfonylphenylvinyl)]thiazolyl}-4,5-bis(4-methoxy-phenyl) imidazole (6)

Similar procedure as for **4** led to **6** as a yellowish solid (52%yield). MP 217-219 oC. 1H NMR (CDCl3):  7.92 (d, 2H, J=8.4 Hz), 7.81 (s, 1H), 7.64 (d, 2H, J=8.4 Hz), 7.47 (d, 2H, J=8.4 Hz), 7.38 (d, 1H, J=16.0 Hz), 7.29 (d, 2H, J=8.8 Hz), 7.02 (d, 2H, J=8.8 Hz), 6.96 (d, 1H, J=16.0 Hz), 6.79 (d, 2H, J=8.4 Hz), 3.90 (s, 3H), 3.89 (s, 3H), 3.78 (s, 3H), 3.08 (s, 3H),.13C NMR (CDCl3):160.4, 160.1, 158.9, 143.9, 142.4, 140.0, 139.5, 139.3, 137.3, 132.6, 132.4, 132.3, 129.6, 128.6, 128.3, 127.3, 127.1, 122.7, 122.5, 115.0, 114.9, 114.1, 113.8, 56.2, 55.8, 55.3, 54.9, 44.9, 34.2. MS: *m/z* 557 (M+). Anal. Calcd for C30H27N3O4S2: C, 64.61; H, 4.88; N, 7.53; O, 11.48; S, 11.50. Found: C, 64.37; H, 4.94; N, 7.23;

**Two-photon measurement by the Z-scan method**

The open aperture Z-scan experiments employed laser pulses from an optical parametric amplifier (TOPAS, from Light Conversion) pumped by 150 fs pulses at 775 nm delivered by a Ti:sapphire chirped pulse amplified system (CPA-2001, from Clark-MXR Inc.) operating at a 1 kHz repetition rate. Pulse energies used here were limited to 0.01J to avoid photo-degradation of the chromophores. The FWHM pulse duration delivered by the OPA was about 120 fs, and the spatial profile of the laser beam presented an approximately Gaussian distribution. The beam waist size employed in our experiments was typically around 15 m. The solvent uses chloroform (HPLC grade) because of its good solubility. The condition in which results are obtained from this solvent is checked against results from the use of other solvents such as DMSO and methanol.

The transmittance change (T) measured through the Z-scan experiment as a function of the wavelength indicates two distinct absorptive nonlinear processes. For nonresonant excitation, the decrease in the normalized transmittance indicates a 2PA process (**4** as an example in blue line in Figure 1). When resonant excitation is used, the transmittance increases, characterizing a saturated absorption due to the occurrence of excited state process (**4** as an example in red line in Figure 1). For wavelengths between the resonant and the nonresonant region there is a competition between the two-photon and the saturable absorption processes, which cancel each other (not shown), and no changes are observed in the normalized transmittance for a specific wavelength. These results were observed for all compounds studied. Although the saturable absorption (SA) process investigation is also important, in this paper we focus only on the 2PA process. In this way, the nonlinear absorption spectra will be limited to the non-resonant region.

Using the nonlinear absorption coefficient, , determined through the Z-scan signature fittings, the 2PA cross-section, , can be calculated through the expression  = h/N, where N is the number of molecules per cm3 and h is the photon energy. Usually,  is expressed in Goppert-Mayer units (GM), with 1 GM = 1 x 10-50 cm4 s mlecules-1 photon-1. Figure S1 shows the 2PA cross-section spectra for all the compounds studied coupled with one-photon absorption.

Figure S1. Linear absorption spectrum (solid dark lines and two photon absorption (points, red line) for all six compounds.
